# Supplementary material for: Management and Survival of Elderly and Very Elderly Patients with Ovarian Cancer: An Age-Stratified Study of 1123 Women from the FRANCOGYN Group
Source: MDPI journal article supplement (doi:10.3390/jcm9051451), 2020-05-13
Supplement: s1 [file s1]

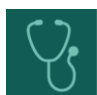

# Supplementary data

Table S1. Perioperative Complications.

|                                                           | Population |       | Age < 65 |       | Age 65 to 74 |       | Age ≥ 75 |       | p Value |
|-----------------------------------------------------------|------------|-------|----------|-------|--------------|-------|----------|-------|---------|
|                                                           | n =        | 979   | n =      | 615   | n =          | 225   | n =      | 139   |         |
|                                                           |            | 100%  |          | 62.8% |              | 22.6% |          | 14.2% |         |
| <b>Peroperative Complications</b>                         | 181        | 18.5% | 105      | 17.1% | 46           | 20.4% | 30       | 21.6% | 0.321   |
| Hemorrhage/ Transfusion                                   | 87         | 8.9%  | 47       | 7.6%  | 22           | 9.8%  | 18       | 12.9% |         |
| Digestive wound                                           | 11         | 1.1%  | 8        | 1.3%  | 0            | 0.0%  | 3        | 2.2%  |         |
| Vascular wound                                            | 6          | 0.6%  | 4        | 0.7%  | 1            | 0.4%  | 1        | 0.7%  |         |
| Diaphragmatic wound/Pneumothorax                          | 9          | 0.9%  | 8        | 1.3%  | 1            | 0.4%  | 0        | 0.0%  |         |
| Ureteral or bladder wound                                 | 5          | 0.5%  | 2        | 0.3%  | 1            | 0.4%  | 2        | 1.4%  |         |
| Tumor rupture                                             | 12         | 1.2%  | 8        | 1.3%  | 2            | 0.9%  | 2        | 1.4%  |         |
| <b>Postoperative Complications</b>                        | 202        | 20.6% | 131      | 21.3% | 47           | 20.9% | 24       | 17.3% | 0.566   |
| Hemorrhage/ Transfusion                                   | 18         | 1.8%  | 9        | 1.5%  | 2            | 0.9%  | 7        | 5.0%  |         |
| Digestive (fistula, peritonitis, occlusion, pancreatitis) | 53         | 5.4%  | 36       | 5.9%  | 11           | 4.9%  | 6        | 4.3%  |         |
| Urinary                                                   | 19         | 1.9%  | 11       | 1.8%  | 5            | 2.2%  | 3        | 2.2%  |         |
| Lymphocele                                                | 19         | 1.9%  | 13       | 2.1%  | 6            | 2.7%  | 0        | 0.0%  |         |
| Abdominal wall (disunion, abscess, evisceration)          | 33         | 3.4%  | 16       | 2.6%  | 12           | 5.3%  | 5        | 3.6%  |         |
| Respiratory                                               | 39         | 4.0%  | 30       | 4.9%  | 5            | 2.2%  | 4        | 2.9%  |         |
| Pneumonia                                                 | 10         | 1.0%  | 6        | 1.0%  | 1            | 0.4%  | 3        | 2.2%  | 0.649   |
| Pneumothorax                                              | 4          | 0.4%  | 2        | 0.3%  | 2            | 0.9%  | 0        | 0.0%  |         |
| Pulmonary embolism                                        | 11         | 1.1%  | 9        | 1.5%  | 2            | 0.9%  | 0        | 0.0%  |         |
| Pleural effusion                                          | 14         | 1.4%  | 13       | 2.1%  | 0            | 0.0%  | 1        | 0.7%  |         |
| Thrombosis                                                | 11         | 1.1%  | 6        | 1.0%  | 5            | 2.2%  | 0        | 0.0%  |         |
| Infection (sepsis, pelvic abscess)                        | 22         | 2.2%  | 16       | 2.6%  | 4            | 1.8%  | 2        | 1.4%  |         |
| Neurological deficit                                      | 7          | 0.7%  | 5        | 0.8%  | 1            | 0.4%  | 1        | 0.7%  |         |
| <b>Repeat surgery</b>                                     | 51         | 5.2%  | 34       | 5.5%  | 12           | 5.3%  | 5        | 3.6%  | 0.379   |
| <b>Overall Complications</b>                              |            |       |          |       |              |       |          |       |         |
| No                                                        | 428        | 56%   | 259      | 54%   | 104          | 58%   | 65       | 61%   |         |
| Minor complications                                       | 263        | 34%   | 178      | 37%   | 53           | 30%   | 32       | 30%   |         |
| Major complications                                       | 73         | 10%   | 41       | 9%    | 22           | 12%   | 10       | 9%    |         |
